# Supplementary material for: Validated simultaneous determination of antipyrine and benzocaine HCl in the presence of benzocaine HCl degradation product
Source: Royal Society of Chemistry journal article supplement (doi:10.1039/c3ay42170h), 2014-01-01
Supplement: c3ay42170h1.pdf [file c3ay42170h1.pdf]

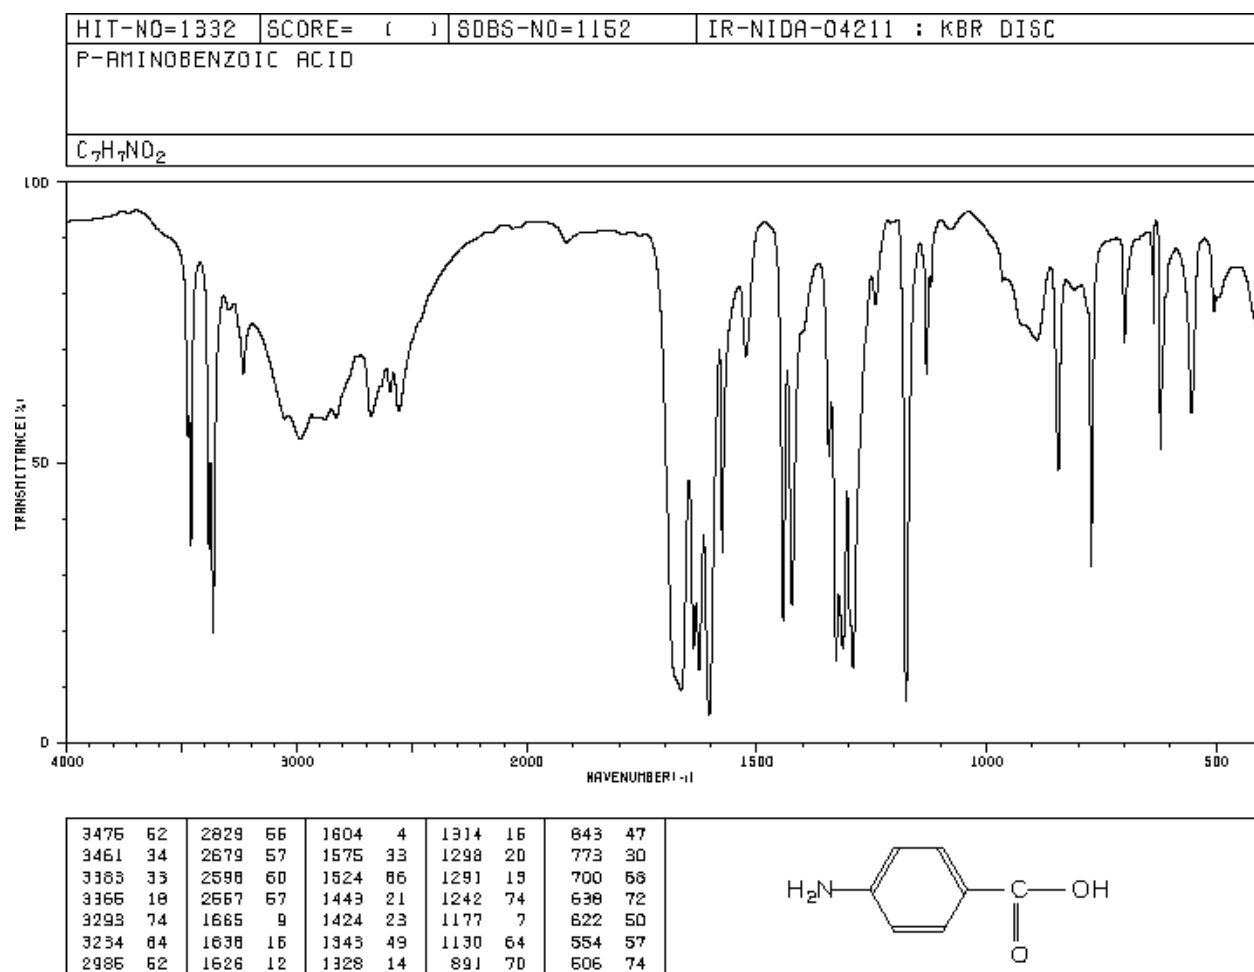

IR spectrum of pure para-aminobenzoic acid

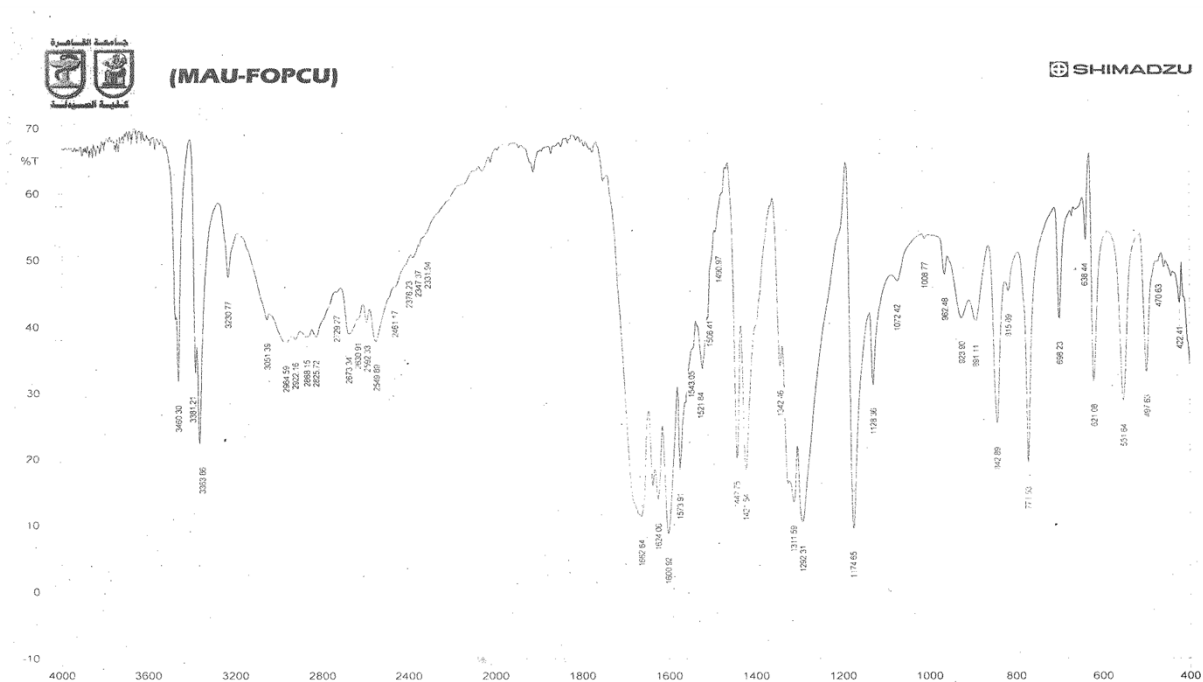

IR spectrum of the prepared para-aminobenzoic acid (PABA)

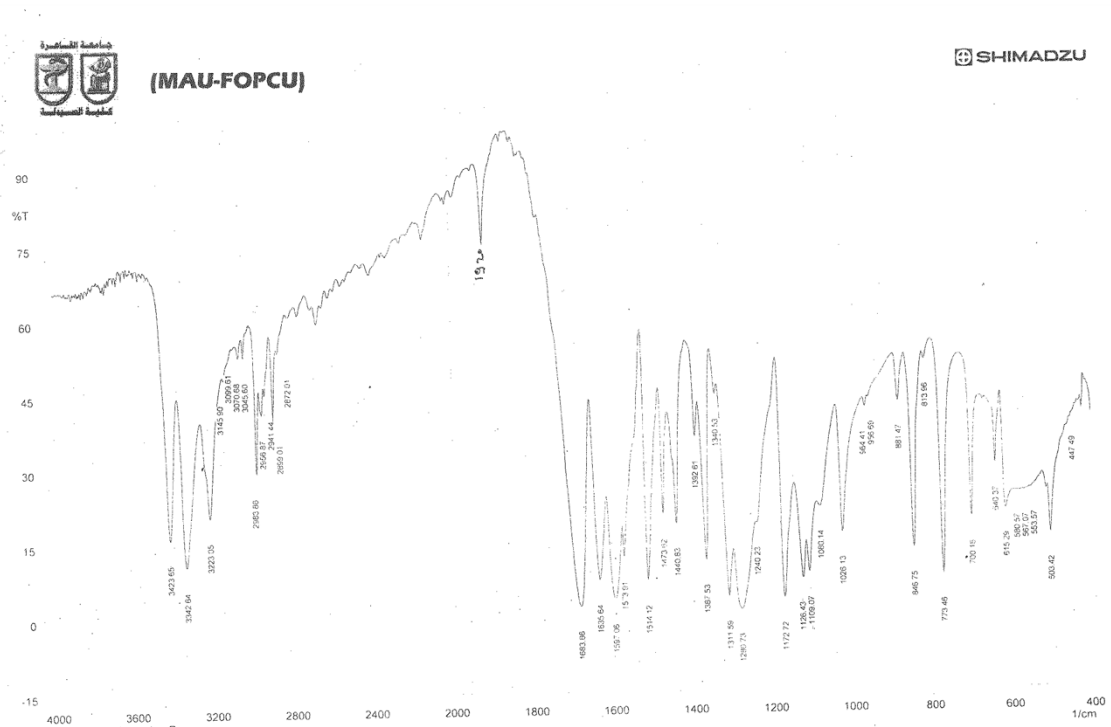

IR spectrum of benzocaine HCl
